# Supplementary material for: Genomic C-Value Variation Analysis in Jujube (Ziziphus jujuba Mill.) in the Middle Yellow River Basin
Source: MDPI journal article supplement (doi:10.3390/plants12040858), 2023-02-14
Supplement: s1 [file s1]

TableS4 Analysis of least significant difference (LSDs) of genomic C-values of jujube in Sub-regions

| Sub-region       | Germplasm name | Genomic C-value       |
|------------------|----------------|-----------------------|
| Yonghe           | YHTZ           | 0.23991±0.00499 A     |
|                  | YHSZ1          | 0.21966±0.00099 B     |
| F=37.885, P<0.01 |                |                       |
| Loufan           | LFCZ           | 0.22388±0.00401 A     |
|                  | LFSZ           | 0.22587±0.00400 A     |
| F=0.311, P>0.05  |                |                       |
| Xiangfen         | XFHLZ          | 0.22141±0.00100 BC    |
|                  | XFGTW          | 0.23414±0.00300 A     |
|                  | XFZSGT         | 0.22146±0.00100 BC    |
|                  | XFWSGT         | 0.23110±0.00601 A     |
|                  | XFGTZ          | 0.23253±0.00400 A     |
|                  | XFMZ           | 0.23171±0.00899 A     |
|                  | XFYZZ          | 0.22889±0.00199 AB    |
|                  | XFGT-1         | 0.22732±0.00100 AB    |
|                  | XFGT-2         | 0.21909±0.00300 C     |
|                  | XFYZ           | 0.23170±0.00500 A     |
| F=4.399, P<0.01  |                |                       |
| Jishan           | JSNYDBZ        | 0.22062±0.00132 CDEF  |
|                  | JSNYXBZ        | 0.23332±0.00700 BC    |
|                  | JSMHZ          | 0.20880±0.00100 EFG   |
|                  | JSLYPCZ        | 0.21158±0.00300 DEFG  |
|                  | JSLYYZ         | 0.20477±0.00600 G     |
|                  | JSLYJXZ        | 0.21033±0.00801 FG    |
|                  | JSLYMTZ        | 0.21268±0.00200 BCDE  |
|                  | JSSZ           | 0.22667±0.01000 BCDE  |
|                  | JSHMZ          | 0.22205±0.00300 CDEF  |
|                  | JSZYZ          | 0.23076±0.00201 BCD   |
|                  | JSDBZ          | 0.24166±0.00500 B     |
|                  | JSBZY          | 0.22605±0.00099 BCDEF |
|                  | JSLGZ          | 0.23620±0.01101 BC    |
|                  | JSCZ           | 0.25719±0.00301 A     |
| F=8.104, P<0.01  |                |                       |
| Pinglu           | PLWWZ          | 0.22421±0.00200 AB    |
|                  | PLGDZ          | 0.21949±0.00301 B     |
|                  | PLLZ           | 0.20949±0.00501 C     |
|                  | PLTTZ          | 0.22847±0.00400 A     |
|                  | PLJZ           | 0.22810±0.00500 AB    |
| F=9.976, P<0.01  |                |                       |
| Pingyao          | PYLJZ          | 0.21049±0.00400 b     |
|                  | PYSBL          | 0.21092±0.00099 b     |

|                 |          |                      |
|-----------------|----------|----------------------|
|                 | PYBJZ    | 0.22559±0.00399 a    |
|                 | PYKDZ    | 0.21690±0.00399 b    |
|                 | PYDZ     | 0.21525±0.00502 b    |
| F=4.17, P<0.05  |          |                      |
| Taigu           | TGNTSMZ  | 0.20772±0.00100 F    |
|                 | TGFCCZ   | 0.20773±0.00700 F    |
|                 | TGFCJZZ  | 0.21407±0.00599 DF   |
|                 | TGDGHPZ  | 0.22873±0.00333 AB   |
|                 | TGYZGZ   | 0.22545±0.00902 ABC  |
|                 | TGLZ     | 0.23076±0.00399 A    |
|                 | TGYZ     | 0.21843±0.00500 CDEF |
|                 | TGMXZ    | 0.23402±0.00199 A    |
|                 | TGLHZ    | 0.21327±0.00100 F    |
|                 | TGCSZ    | 0.21982±0.00400 BCD  |
|                 | TGGYH    | 0.22628±0.00500 ABC  |
|                 | TGDMZ    | 0.22452±0.00599 ABC  |
|                 | TGMXH    | 0.22705±0.00500 ABC  |
|                 | TGLJZ-1  | 0.22660±0.00499 ABC  |
|                 | TGLJZ-2  | 0.22505±0.00401 ABC  |
| F=5.478, P<0.01 |          |                      |
| Yuci            | YCZCGYZ  | 0.21036±0.00200 BC   |
|                 | YCZCTSZ  | 0.21307±0.01099 BC   |
|                 | YCZZXSYZ | 0.20358±0.00599 C    |
|                 | YCMZ     | 0.21951±0.00099 ABC  |
|                 | YCCMZZ   | 0.23047±0.00602 A    |
|                 | YCNTZ    | 0.22199±0.00100 AB   |
|                 | YCYZ     | 0.22177±0.00599 AB   |
| F=4.039, P<0.05 |          |                      |
| Lintong         | LTMHL    | 0.21607±0.00099 A    |
|                 | LTGLZ    | 0.21910±0.00401 A    |
| F=2.001, P>0.05 |          |                      |
| Yanchuan        | YCNNZ    | 0.24728±0.00099 A    |
|                 | YCLYDSZ  | 0.21008±0.01901      |
|                 | YCGTZ-1  | 0.21943±0.00402 BC   |
|                 | YCGTZ-2  | 0.21798±0.00100 BC   |
|                 | YCXCMZ   | 0.21769±0.00100 BC   |
|                 | YCTZZ    | 0.21781±0.00100 BC   |
|                 | YCCMZ    | 0.23138±0.00010 AB   |
|                 | YCDBZ    | 0.21732±0.00600 B    |
|                 | YCHTZ    | 0.22174±0.00698 BC   |
|                 | YCBZ     | 0.21710±0.00399      |
|                 | YCDYZ    | 0.22247±0.00501      |

|          |                  |                       |
|----------|------------------|-----------------------|
|          | YCTZ             | 0.21351±0.00199       |
|          | YCBZZ            | 0.21358±0.00199       |
|          | F=3.862, P<0.01  |                       |
| Yanliang | YLMTZ            | 0.21094±0.00500 b     |
|          | YLCZ             | 0.22868±0.00599 a     |
|          | YLYZ             | 0.21700±0.00200 b     |
|          | Y LXZ            | 0.21617±0.00499 b     |
|          | YLLLZ            | 0.21883±0.00400 b     |
|          | F=6.058, P<0.05  |                       |
| Dali     | DLMGX-1          | 0.22215±0.00500 BCDE  |
|          | DLXDD            | 0.22009±0.00099 BCDEF |
|          | DLMYZ            | 0.23982±0.00199 A     |
|          | DLJDZ            | 0.22286±0.00100 BCD   |
|          | DLLZ             | 0.22471±0.00400 BC    |
|          | DLLLZ            | 0.21958±0.00698 BCDEF |
|          | DLYZ             | 0.21363±0.00199 EF    |
|          | DLGWB            | 0.21132±0.00099 F     |
|          | DLPCZ            | 0.21503±0.00301 DEF   |
|          | DLZZ             | 0.21527±0.00101 DEF   |
|          | DLFMG            | 0.21953±0.00400 BCDEF |
|          | DLGDZ            | 0.21217±0.00301 F     |
|          | DLNZ             | 0.22617±0.00301 B     |
|          | DLBSH            | 0.21790±0.00100 BCDEF |
|          | DLMZ             | 0.21693±0.00399 CDEF  |
|          | DLZCBZ           | 0.22436±0.00101 BC    |
|          | F=7.136, P<0.01  |                       |
| Qingxu   | QXMGZ            | 0.22404±0.00300 a     |
|          | QXPGZ            | 0.21679±0.00199 a     |
|          | QXYZ             | 0.22163±0.00898 a     |
|          | F=1.307, P>0.05  |                       |
| Shilou   | SLCZ             | 0.21939±0.00401 a     |
|          | SLSZ             | 0.22792±0.00100 b     |
|          | F=10.895, P<0.05 |                       |
| Yuncheng | YCCZ             | 0.22128±0.00600 C     |
|          | YCHMZ            | 0.21958±0.00099 C     |
|          | YCMZZ            | 0.22926±0.00401 B     |
|          | YCPPZ            | 0.24756±0.00300 A     |
|          | F=30.772, P<0.01 |                       |
| Linyi    | LYWMZ            | 0.21778±0.00100 b     |
|          | LYZZLZ           | 0.21480±0.00200 b     |
|          | LYYZ             | 0.21753±0.00798 b     |
|          | LYDCGZ           | 0.21743±0.00600 b     |

|                  |           |                             |
|------------------|-----------|-----------------------------|
|                  | LYDCYZ    | 0.22302±0.00201 b           |
|                  | LYLZ      | 0.24411±0.00801 a           |
|                  | LYLJZ     | 0.22428±0.01000 b           |
| F=6.342, P<0.05  |           |                             |
| Xiaxian          | XXLYKZ    | 0.22963±0.00200 a           |
|                  | XXYCZ     | 0.23150±0.00299 a           |
|                  | XXZYZ     | 0.22883±0.00199 a           |
| F=1.005, P>0.05  |           |                             |
| Jiaxian          | JXHDDZ    | 0.21477±0.00399 A           |
|                  | JXCMZ     | 0.23830±0.00500 B           |
| F=35.228, P<0.01 |           |                             |
| Baode            | BDXZ      | 0.24024±0.00702 a           |
|                  | BDYZ      | 0.25294±0.00799 a           |
| F=4.185, P>0.02  |           |                             |
| Zhongyang        | ZYMZ      | 0.23549±0.00301 a           |
|                  | ZYTZ      | 0.22117±0.00599 b           |
| F=14.173, P<0.05 |           |                             |
| Jiaocheng        | JCJZ      | 0.22359±0.00300 a           |
|                  | JCDZ      | 0.23151±0.00199 b           |
| F=18.732, P<0.05 |           |                             |
| Pucheng          | PCMZ      | 0.22143±0.00301 a           |
|                  | PCYLZ     | 0.21607±0.00099 a           |
|                  | PCDDZ     | 0.21774±0.00398 a           |
|                  | PCZDZ     | 0.21688±0.00499 a           |
| F=1.092, P>0.05  |           |                             |
| Linxian          | LXMJW-1   | 0.25559±0.00455 A           |
|                  | LXMJW-2   | 0.24662±0.00335 ABCDE       |
|                  | LXMJW-3   | 0.24119±0.0097 ABCDEFG      |
|                  | LXMJW-4   | 0.25135±0.00137 AB          |
|                  | LXXZZ-2   | 0.24856±0.0085 ABCD         |
|                  | LXXZZ-1   | 0.25082±0.00826 AB          |
|                  | LXWJZDZ   | 0.24969±0.01293 ABC         |
|                  | LXYJZ-1   | 0.25313±0.00008 AB          |
|                  | LXYJZ-2   | 0.2378±0.00069 ABCDEFGHI    |
|                  | LXYJZ-3   | 0.23711±0.00918 BCDEFGHIJ   |
|                  | LXTHDMZ-1 | 0.24027±0.00215 ABCDEFGH    |
|                  | LXWJZMYZ  | 0.2273±0.00185 GHIJKLMNOP   |
|                  | LXSJLNNZ  | 0.22777±0.00141 FGHIJKLMNOP |
|                  | LXQYNNZ   | 0.21633±0.00311 KLMNOP      |
|                  | LXCNNZ    | 0.22209±0.0121 HIJKLMNOP    |
|                  | LXXZZ-2   | 0.21841±0.0074 KLMNOP       |
|                  | LXYZCZ    | 0.21886±0.00524 JKLMNOP     |

|           |                 |            |
|-----------|-----------------|------------|
| LXKYDSZ   | 0.23908±0.0003  | ABCDEFGH   |
| LXEBCSZ   | 0.2338±0.00265  | BCDEFGHIJK |
| LXEBCCMZ  | 0.23048±0.00431 | DEFGHIJKLM |
| LXLJHPBB  | 0.24204±0.00591 | ABCDEFG    |
| SXLXZ22   | 0.22982±0.0068  | EFGHIJKLMN |
| SXLXZ23   | 0.2122±0.00666  | MNOP       |
| SXLXZ24   | 0.2144±0.0007   | KLMNOP     |
| SXLXZ25   | 0.21333±0.00527 | LMNOP      |
| SXLXZ26   | 0.21418±0.00299 | LMNOP      |
| LXWWZ     | 0.21163±0.01031 | NOP        |
| LXYLLZ    | 0.20582±0.00153 | P          |
| LXLJPAAZ  | 0.24571±0.00771 | ABCDEF     |
| LXHGZ     | 0.21552±0.00298 | KLMNOP     |
| LXGJJZ    | 0.23797±0.00104 | ABCDEFGH   |
| LXXCZ     | 0.23099±0.00449 | DEFGHIJKL  |
| LXQJSTZ   | 0.21403±0.00069 | LMNOP      |
| LXYJMYZ   | 0.23151±0.00345 | CDEFGHIJKL |
| LXLJZ     | 0.21962±0.00232 | IJKLMNOP   |
| LXQJSLJZ  | 0.21703±0.00684 | KLMNOP     |
| LXQJSLJZ  | 0.21935±0.00071 | JKLMNOP    |
| LXQJSDMZ  | 0.22379±0.00643 | GHIJKLMNOP |
| LXQJSFZ-2 | 0.21436±0.00656 | LMNOP      |
| LMX1      | 0.22396±0.00239 | GHIJKLMNOP |
| LXSEZ     | 0.22238±0.00664 | HIJKLMNOP  |
| LXRHZ     | 0.22202±0.00831 | HIJKLMNOP  |
| LXYZ      | 0.21734±0.00234 | KLMNOP     |
| LXMZ      | 0.21845±0.00663 | KLMNOP     |
| LXDSZ     | 0.22215±0.0004  | HIJKLMNOP  |
| LXSTZ     | 0.21212±0.00365 | NOP        |
| LXHTZ     | 0.23116±0.00672 | DEFGHIJKL  |
| LXHZ      | 0.22509±0.0064  | GHIJKLMNO  |
| LXDLLZ    | 0.22425±0.00325 | GHIJKLMNO  |
| LXHHZ     | 0.21893±0.00281 | JKLMNOP    |
| LYHDZ     | 0.20962±0.00484 | OP         |
| LXMZLMZ   | 0.22536±0.00646 | GHIJKLMNO  |
| LXMAISZ   | 0.23322±0.00405 | BCDEFGHIJK |

F = 14.89, p < 0.0001

|          |        |                 |
|----------|--------|-----------------|
| Xian     | XADBZ  | 0.21073±0.00200 |
| Xingxian | XXLPZ  | 0.22463±0.00699 |
| Yongji   | YJHMZ  | 0.28574±0.00200 |
| Taiyuan  | TYPZZ  | 0.22522±0.00500 |
| Qixian   | QXJLCZ | 0.22113±0.00599 |

|        |       |                 |
|--------|-------|-----------------|
| Xixian | XXDSZ | 0.20824±0.00200 |
|--------|-------|-----------------|

The data in the table is mean ± standard deviation. Means with the same lowercase letters were not significantly different at ( $P < 0.05$ ). Means with the same capital letters were not significantly different at ( $p < 0.01$ )
