# Supplementary material for: Genomic C-Value Variation Analysis in Jujube (Ziziphus jujuba Mill.) in the Middle Yellow River Basin
Source: MDPI journal article supplement (doi:10.3390/plants12040858), 2023-02-14
Supplement: s1 [file s1]

Table S3 Fruit trait data of 89 representative jujube germplasm

| No. | Germplasm<br>name | FL   |      |      |      |       |       |      |           |       | ploidy | genome<br>size/Mb |
|-----|-------------------|------|------|------|------|-------|-------|------|-----------|-------|--------|-------------------|
|     |                   | SRW  | D    | FTP  | SW   | SF    | TS    | TA   | VC        | FER   |        |                   |
|     |                   | g    | cm   | cm   | g    | %     | %     | %    | mg/(100g) | %     |        |                   |
| 1   | LXMJW-1           | 18.1 | 4.22 | 3.10 | 0.42 | 28.67 | 26.08 | 0.82 | 527.04    | 97.66 | 2X     | 499.93            |
| 2   | LXMJW-2           | 11.3 | 3.83 | 2.54 | 0.32 | 32.00 | 30.87 | 0.56 | 410.68    | 97.20 | 2X     | 482.39            |
| 3   | LXMJW-3           | 15.2 | 4.78 | 2.67 | 0.45 | 28.33 | 29.49 | 0.85 | 468.97    | 97.08 | 2X     | 471.76            |
| 4   | LXMJW-4           | 21.1 | 4.16 | 3.57 | 0.45 | 28.33 | 29.49 | 0.85 | 468.97    | 97.87 | 2X     | 491.65            |
| 5   | LXXZZ-1           | 11.8 | 3.97 | 2.61 | 0.29 | 27.00 | 25.67 | 0.81 | 509.09    | 97.55 | 2X     | 490.61            |
| 6   | LXWJZDZ           | 14.9 | 3.97 | 2.88 | 0.29 | 27.00 | 25.48 | 0.52 | 455.45    | 98.08 | 2X     | 488.4             |
| 7   | JSCZ              | 13.8 | 3.98 | 2.80 | 0.26 | 28.00 | 25.69 | 0.68 | 455.90    | 98.10 | 2X     | 503.06            |
| 8   | LXYJZ-2           | 17.9 | 4.59 | 3.06 | 0.49 | 27.00 | 26.53 | 0.36 | 454.34    | 97.28 | 2X     | 465.14            |
| 9   | YHTZ              | 10.6 | 4.04 | 2.37 | 0.26 | 30.67 | 30.36 | 0.60 | 496.45    | 97.54 | 2X     | 469.26            |
| 10  | LXWJZMYZ          | 6.5  | 3.00 | 2.24 | 0.27 | 27.00 | 25.48 | 0.52 | 455.45    | 95.80 | 2X     | 444.6             |
| 11  | LXQYNNZ           | 13.5 | 4.76 | 2.45 | 0.35 | 29.00 | 25.43 | 0.60 | 487.05    | 97.40 | 2X     | 423.14            |
| 12  | LXXZZ-2           | 9.1  | 3.07 | 2.52 | 0.28 | 29.50 | 26.58 | 0.46 | 324.50    | 96.87 | 2X     | 427.22            |
| 13  | LXYZCZ            | 13.2 | 3.46 | 2.80 | 0.75 | 27.67 | 27.04 | 1.35 | 402.93    | 94.30 | 2X     | 428.09            |
| 14  | LXKYDSZ           | 7.0  | 2.68 | 2.31 | 0.48 | 26.50 | 19.22 | 1.73 | 579.91    | 93.15 | 2X     | 467.64            |
| 15  | LXEBCCMZ          | 10.1 | 3.63 | 2.46 | 0.20 | 29.00 | 24.58 | 0.63 | 467.32    | 97.97 | 2X     | 450.82            |
| 16  | LXLJHPBB          | 11.9 | 3.70 | 2.57 | 0.41 | 32.50 | 28.08 | 0.86 | 312.66    | 96.58 | 2X     | 473.42            |
| 17  | LXLJHZ            | 13.2 | 4.34 | 2.64 | 0.32 | 26.00 | 20.38 | 1.03 | 671.88    | 97.58 | 2X     | 449.53            |
| 18  | LXQKNXC           | 12.5 | 3.90 | 2.65 | 0.34 | 33.00 | 28.68 | 0.60 | 460.11    | 97.30 | 2X     | 415.07            |
| 19  | LXQKBZ            | 12.9 | 4.26 | 2.73 | 0.39 | 29.0  | 26.1  | 0.6  | 373.3     | 97.01 | 2X     | 419.37            |
| 20  | LXYLLZ            | 16.4 | 4.32 | 2.96 | 0.71 | 31.50 | 32.31 | 0.60 | 373.21    | 95.67 | 2X     | 402.58            |
| 21  | LXLJPAAZ          | 20.7 | 4.74 | 3.33 | 0.53 | 30.00 | 21.07 | 0.38 | 554.56    | 97.45 | 2X     | 480.61            |
| 22  | PYBJZ             | 15.4 | 3.98 | 2.96 | 0.48 | 26.00 | 21.24 | 0.40 | 301.69    | 96.91 | 2X     | 441.26            |
| 23  | YCZCGYZ           | 10.0 | 3.22 | 2.53 | 0.43 | 33.00 | 25.46 | 0.43 | 395.35    | 95.67 | 2X     | 411.46            |
| 24  | YCZCTSZ           | 7.1  | 2.98 | 2.27 | 0.47 | 29.00 | 23.21 | 0.82 | 289.80    | 93.35 | 2X     | 416.77            |
| 25  | YCZZXSYZ          | 9.6  | 3.39 | 2.53 | 0.43 | 26.00 | 23.42 | 0.65 | 307.92    | 95.52 | 2X     | 398.2             |
| 26  | YCLYDSZ           | 10.2 | 4.19 | 2.33 | 0.35 | 29.67 | 25.55 | 0.61 | 425.31    | 96.62 | 2X     | 410.92            |
| 27  | DLMGX-1           | 9.0  | 3.11 | 2.39 | 0.53 | 32.50 | 27.18 | 0.42 | 217.86    | 94.07 | 2X     | 434.52            |
| 28  | LXYJMYZ           | 14.6 | 4.04 | 2.82 | 0.37 | 33.50 | 29.65 | 0.71 | 281.12    | 97.50 | 2X     | 452.83            |
| 29  | XXLPZ             | 15.2 | 3.75 | 2.95 | 0.43 | 27.00 | 26.20 | 0.42 | 510.69    | 97.15 | 2X     | 439.37            |
| 30  | LXQJSLJZ          | 8.9  | 3.90 | 2.44 | 0.35 | 30.00 | 28.42 | 0.39 | 444.85    | 96.13 | 2X     | 424.5             |
| 31  | LXQJSDMZ          | 12.1 | 4.15 | 2.60 | 0.32 | 30.00 | 28.42 | 0.39 | 444.85    | 97.39 | 2X     | 429.05            |
| 32  | LXQJS-1           | 10.8 | 3.88 | 2.50 | 0.34 | 31.00 | 28.42 | 0.51 | 467.35    | 96.84 | 2X     | 437.73            |
| 33  | YCCMZ             | 14.0 | 3.96 | 2.76 | 0.40 | 29.50 | 27.47 | 0.52 | 430.41    | 97.15 | 2X     | 452.57            |
| 34  | QXMGZ             | 19.8 | 3.82 | 3.29 | 0.63 | 28.00 | 26.29 | 0.58 | 208.65    | 96.85 | 2X     | 438.22            |
| 35  | JSSZ              | 17.0 | 4.13 | 3.15 | 0.63 | 28.00 | 22.70 | 0.68 | 195.76    | 96.28 | 2X     | 443.36            |
| 36  | JSHMZ             | 7.9  | 2.93 | 2.33 | 0.24 | 35.00 | 28.88 | 0.55 | 366.58    | 96.97 | 2X     | 434.33            |
| 37  | JSZYZ             | 13.0 | 3.75 | 2.75 | 0.32 | 29.50 | 26.58 | 0.46 | 324.50    | 97.58 | 2X     | 451.37            |
| 38  | YCMZ              | 9.1  | 3.37 | 2.47 | 0.23 | 30.00 | 27.40 | 0.67 | 297.00    | 97.53 | 2X     | 429.37            |
| 39  | LXSEZ             | 7.4  | 3.31 | 2.27 | 0.31 | 31.00 | 27.75 | 0.61 | 514.10    | 95.83 | 2X     | 434.98            |
| 40  | LXDSZ             | 4.9  | 2.32 | 2.03 | 0.50 | 27.67 | 27.04 | 1.35 | 402.93    | 89.79 | 2X     | 434.52            |

|    |         |      |      |      |      |       |       |      |        |       |    |        |
|----|---------|------|------|------|------|-------|-------|------|--------|-------|----|--------|
| 41 | LXHZ    | 26.5 | 4.89 | 3.50 | 0.78 | 34.00 | 25.53 | 0.39 | 259.39 | 97.04 | 2X | 440.28 |
| 42 | LYHDZ   | 9.0  | 4.10 | 2.16 | 0.31 | 27.00 | 24.97 | 0.67 | 246.68 | 96.63 | 2X | 410.01 |
| 43 | LYDCGZ  | 12.8 | 4.63 | 2.42 | 0.48 | 29.0  | 26.1  | 0.6  | 373.3  | 96.24 | 2X | 425.29 |
| 44 | LFSZ    | 8.0  | 3.46 | 2.80 | 0.75 | 27.67 | 27.04 | 1.35 | 402.93 | 94.30 | 2X | 441.8  |
| 45 | YCDBZ   | 23.1 | 3.53 | 3.21 | 0.92 | 24.00 | 23.04 | 0.16 | 221.58 | 96.00 | 2X | 425.07 |
| 46 | YCBZ    | 13.2 | 3.55 | 2.85 | 0.87 | 29.40 | 29.08 | 0.29 | 382.16 | 93.42 | 2X | 424.64 |
| 47 | LYLZ    | 31.6 | 4.54 | 3.96 | 1.08 | 27.00 | 22.50 | 0.37 | 292.25 | 95.44 | 2X | 477.47 |
| 48 | LYLJZ   | 20.8 | 4.41 | 2.91 | 1.37 | 27.67 | 19.25 | 0.36 | 288.68 | 93.40 | 2X | 438.7  |
| 49 | BDXZ    | 10.6 | 3.48 | 2.57 | 0.33 | 33.60 | 27.36 | 1.02 | 415.13 | 97.60 | 2X | 469.91 |
| 50 | BDYZ    | 10.9 | 3.42 | 2.66 | 0.38 | 33.60 | 26.65 | 0.78 | 511.44 | 97.22 | 2X | 494.76 |
| 51 | ZYMZ    | 10.2 | 3.75 | 2.41 | 0.37 | 25.20 | 22.69 | 0.74 | 502.90 | 96.35 | 2X | 460.62 |
| 52 | ZY TZ   | 18.3 | 3.51 | 3.32 | 0.57 | 28.80 | 24.60 | 0.41 | 382.16 | 96.89 | 2X | 432.6  |
| 53 | QXYZ    | 14.6 | 3.12 | 3.10 | 0.68 | 33.00 | 24.76 | 0.56 | 264.95 | 93.48 | 2X | 433.51 |
| 54 | XFYZ    | 16.4 | 3.55 | 2.93 | 0.62 | 30.00 | 24.46 | 0.48 | 341.39 | 96.10 | 2X | 453.21 |
| 55 | YCPPZ   | 14.1 | 3.51 | 3.09 | 0.62 | 30.60 | 29.00 | 0.37 | 489.40 | 94.53 | 2X | 484.23 |
| 56 | JCJZ    | 26.3 | 5.07 | 3.46 | 0.97 | 33.00 | 28.68 | 0.45 | 432.00 | 97.00 | 2X | 437.35 |
| 57 | YJHMZ   | 25.4 | 4.93 | 3.61 | 0.94 | 32.40 | 28.18 | 0.50 | 420.82 | 95.74 | 2X | 558.91 |
| 58 | XFGTZ   | 12.6 | 3.52 | 2.73 | 0.59 | 34.50 | 24.62 | 0.39 | 445.90 | 95.70 | 2X | 454.82 |
| 59 | XFMZ    | 17.9 | 3.54 | 2.66 | 0.52 | 33.60 | 31.60 | 0.59 | 423.70 | 94.10 | 2X | 453.22 |
| 60 | JSLGZ   | 21.4 | 4.33 | 3.44 | 0.82 | 33.00 | 29.48 | 0.58 | 397.31 | 94.78 | 2X | 462    |
| 61 | LXYJZ-1 | 11.7 | 3.93 | 2.65 | 0.51 | 27.90 | 24.22 | 0.76 | 541.06 | 95.65 | 2X | 495.13 |
| 62 | PLTTZ   | 15.7 | 2.99 | 3.34 | 0.58 | 32.40 | 22.95 | 0.50 | 359.47 | 95.34 | 2X | 446.88 |
| 63 | PLJZ    | 10.2 | 3.74 | 2.36 | 0.56 | 28.50 | 21.18 | 0.52 | 407.97 | 94.31 | 2X | 446.17 |
| 64 | XFYZZ   | 10.5 | 3.27 | 2.56 | 0.38 | 27.90 | 23.27 | 0.99 | 499.75 | 96.38 | 2X | 447.71 |
| 65 | XXYCZ   | 9.6  | 3.01 | 2.46 | 0.55 | 32.40 | 27.67 | 0.65 | 343.61 | 93.22 | 2X | 452.82 |
| 66 | XXYZ    | 16.2 | 3.18 | 3.32 | 0.68 | 40.20 | 30.20 | 0.79 | 371.98 | 94.34 | 2X | 447.59 |
| 67 | JCDZ    | 12.5 | 2.87 | 2.92 | 0.82 | 33.90 | 22.60 | 0.65 | 429.50 | 92.40 | 2X | 452.83 |
| 68 | YCDYZ   | 17.4 | 3.31 | 2.81 | 1.01 | 22.00 | 21.94 | 0.26 | 429.50 | 94.20 | 2X | 435.16 |
| 69 | DLXDD   | 7.1  | 2.40 | 2.30 | 0.54 | 33.60 | 26.73 | 0.66 | 334.02 | 92.65 | 2X | 430.5  |
| 70 | DLMYZ   | 24.0 | 4.22 | 2.55 | 1.00 | 28.60 | 24.76 | 0.50 | 245.29 | 92.53 | 2X | 469.09 |
| 71 | DLJDZ   | 17.2 | 3.97 | 3.14 | 0.83 | 27.00 | 23.50 | 0.43 | 266.17 | 96.41 | 2X | 435.92 |
| 72 | PCMZ    | 17.3 | 3.45 | 3.15 | 0.99 | 37.20 | 28.80 | 0.57 | 446.33 | 92.91 | 2X | 433.12 |
| 73 | PCYLZ   | 19.0 | 3.69 | 3.24 | 0.66 | 36.00 | 29.92 | 0.78 | 426.92 | 95.96 | 2X | 422.64 |
| 74 | PCDDZ   | 19.6 | 3.84 | 3.28 | 0.92 | 33.60 | 24.93 | 0.47 | 372.29 | 94.81 | 2X | 425.89 |
| 75 | DLLZ    | 11.6 | 3.73 | 2.60 | 0.55 | 28.80 | 21.31 | 0.59 | 367.88 | 93.95 | 2X | 439.54 |
| 76 | DLLLZ   | 10.6 | 3.06 | 2.88 | 0.54 | 31.80 | 27.13 | 0.60 | 335.50 | 93.60 | 2X | 429.49 |
| 77 | LTGLZ   | 12.1 | 3.38 | 2.76 | 0.63 | 31.20 | 24.12 | 0.89 | 431.45 | 93.80 | 2X | 428.56 |
| 78 | DLYZ    | 20.3 | 3.92 | 3.37 | 0.85 | 34.20 | 27.74 | 0.72 | 196.01 | 92.89 | 2X | 417.87 |
| 79 | DLGWB   | 16.4 | 3.75 | 3.12 | 0.89 | 32.40 | 26.35 | 0.59 | 209.43 | 94.57 | 2X | 413.35 |
| 80 | YCTZ    | 13.1 | 4.15 | 2.50 | 0.44 | 36.15 | 19.42 | 0.68 | 467.57 | 96.64 | 2X | 417.63 |
| 81 | DLPCZ   | 11.4 | 3.43 | 2.74 | 0.53 | 28.20 | 21.60 | 0.57 | 457.60 | 94.64 | 2X | 420.59 |
| 82 | DLZZ    | 14.0 | 3.66 | 3.03 | 0.72 | 30.90 | 25.66 | 0.67 | 237.62 | 93.83 | 2X | 421.06 |
| 83 | DLFMG   | 9.2  | 2.70 | 2.52 | 0.55 | 31.80 | 25.97 | 0.51 | 359.05 | 94.02 | 2X | 429.41 |
| 84 | DLGDZ   | 18.8 | 3.62 | 3.17 | 0.94 | 31.20 | 24.31 | 0.52 | 322.20 | 93.51 | 2X | 415    |

|    |        |      |      |      |      |       |       |      |        |       |    |        |
|----|--------|------|------|------|------|-------|-------|------|--------|-------|----|--------|
| 85 | DLBSH  | 9.4  | 2.91 | 2.38 | 0.58 | 25.40 | 22.39 | 0.40 | 312.44 | 93.80 | 2X | 426.22 |
| 86 | DLMZ   | 13.5 | 3.29 | 2.78 | 0.65 | 36.00 | 35.74 | 0.30 | 447.14 | 95.19 | 2X | 424.31 |
| 87 | DLZCBZ | 17.9 | 3.60 | 3.15 | 0.75 | 27.60 | 22.19 | 0.51 | 315.97 | 94.56 | 2X | 438.85 |
| 88 | PYKDZ  | 18.3 | 3.51 | 3.47 | 0.59 | 30.00 | 24.86 | 0.61 | 378.23 | 96.92 | 2X | 424.26 |
| 89 | PYDZ   | 7.4  | 3.53 | 2.26 | 0.42 | 29.70 | 24.20 | 0.79 | 447.14 | 95.35 | 2X | 421.03 |

---
