# Supplementary material for: Genomic C-Value Variation Analysis in Jujube (Ziziphus jujuba Mill.) in the Middle Yellow River Basin
Source: MDPI journal article supplement (doi:10.3390/plants12040858), 2023-02-14
Supplement: s1 [file s1]

Table S1 Information on chromosome number and genomic C value of jujube discussed in this study.

| No | Germplasm name | origin           | Longitude   | Latitude   | Genomic C-value |       | ploidy | genome size/Mb |
|----|----------------|------------------|-------------|------------|-----------------|-------|--------|----------------|
|    |                |                  |             |            | Mean±SD(Pg)     | CV(%) |        |                |
| 1  | LXMJW-1        | Linxian,Shanxi   | E110°29'40" | N37°57'25" | 0.25559±0.00498 | 1.95  | 2X     | 499.93         |
| 2  | LXMJW-2        | Linxian,Shanxi   | E110°29'40" | N37°57'25" | 0.24662±0.00298 | 1.21  | 2X     | 482.39         |
| 3  | LXMJW-3        | Linxian,Shanxi   | E110°29'40" | N37°57'25" | 0.24119±0.01001 | 4.15  | 2X     | 471.76         |
| 4  | LXMJW-4        | Linxian,Shanxi   | E110°29'40" | N37°57'25" | 0.25135±0.00101 | 0.4   | 2X     | 491.65         |
| 5  | LXXZZ-1        | Linxian,Shanxi   | E110°29'40" | N37°57'25" | 0.25082±0.00800 | 3.19  | 2X     | 490.61         |
| 6  | LXWJZDZ        | Linxian,Shanxi   | E110°29'40" | N37°57'25" | 0.24969±0.01298 | 5.2   | 2X     | 488.4          |
| 7  | JSCZ           | Jishan,Shanxi    | E110°59'21" | N35°36'37" | 0.25719±0.00301 | 1.17  | 2X     | 503.06         |
| 8  | LXYJZ-2        | Linxian,Shanxi   | E110°29'40" | N37°57'25" | 0.23780±0.00100 | 0.42  | 2X     | 465.14         |
| 9  | YHTZ           | Yonghe,Shanxi    | E110°38'18" | N36°45'57" | 0.23991±0.00499 | 2.08  | 2X     | 469.26         |
| 10 | LXWJZMYZ       | Linxian,Shanxi   | E110°29'40" | N37°57'25" | 0.22730±0.00200 | 0.88  | 2X     | 444.6          |
| 11 | LXQYNNZ        | Linxian,Shanxi   | E110°29'40" | N37°57'25" | 0.21633±0.00301 | 1.39  | 2X     | 423.14         |
| 12 | LXXZZ-2        | Linxian,Shanxi   | E110°29'40" | N37°57'25" | 0.21842±0.00701 | 3.21  | 2X     | 427.22         |
| 13 | LXYZCZ         | Linxian,Shanxi   | E110°29'40" | N37°57'25" | 0.21886±0.00499 | 2.28  | 2X     | 428.09         |
| 14 | LXKYDSZ        | Linxian,Shanxi   | E110°29'40" | N37°57'25" | 0.23908±0.00100 | 0.42  | 2X     | 467.64         |
| 15 | LXEBCCMZ       | Linxian,Shanxi   | E110°29'40" | N37°57'25" | 0.23048±0.00401 | 1.74  | 2X     | 450.82         |
| 16 | LXLJHPBB       | Linxian,Shanxi   | E110°29'40" | N37°57'25" | 0.24203±0.00600 | 2.48  | 2X     | 473.42         |
| 17 | LXLJHZ         | Linxian,Shanxi   | E110°29'40" | N37°57'25" | 0.22982±0.00699 | 3.04  | 2X     | 449.53         |
| 18 | LXQKNXC        | Linxian,Shanxi   | E110°29'40" | N37°57'25" | 0.21220±0.00700 | 3.3   | 2X     | 415.07         |
| 19 | LXQKBZ         | Linxian,Shanxi   | E110°29'40" | N37°57'25" | 0.2144±0.00101  | 0.47  | 2X     | 419.37         |
| 20 | LXYLLZ         | Linxian,Shanxi   | E110°29'40" | N37°57'25" | 0.20582±0.00200 | 0.97  | 2X     | 402.58         |
| 21 | LXLJPAAZ       | Linxian,Shanxi   | E110°29'40" | N37°57'25" | 0.24571±0.00799 | 3.25  | 2X     | 480.61         |
| 22 | PYBJZ          | Pingyao,Shanxi   | E112°10'56" | N37°11'44" | 0.22559±0.00399 | 1.77  | 2X     | 441.26         |
| 23 | YCZCGYZ        | Yuci,Shanxi      | E112°42'52" | N37°42'14" | 0.21036±0.00200 | 0.95  | 2X     | 411.46         |
| 24 | YCZCTSZ        | Yuci,Shanxi      | E112°42'52" | N37°42'14" | 0.21307±0.01099 | 5.16  | 2X     | 416.77         |
| 25 | YCZZXSYZ       | Yuci,Shanxi      | E112°42'52" | N37°42'14" | 0.20358±0.00599 | 2.94  | 2X     | 398.2          |
| 26 | YCLYDSZ        | Yanchuan,Shaanxi | E110°12'1"  | N36°53'2"  | 0.21008±0.01901 | 9.05  | 2X     | 410.92         |
| 27 | DLMGX-1        | Dali,Shanxi      | E109°56'54" | N34°48'6"  | 0.22215±0.00500 | 2.25  | 2X     | 434.52         |
| 28 | LXYJMYZ        | Linxian,Shanxi   | E110°29'40" | N37°57'25" | 0.23151±0.00299 | 1.29  | 2X     | 452.83         |
| 29 | XXLPZ          | Xingxian,Shanxi  | E111°8'3"   | N38°28'7"  | 0.22463±0.00699 | 3.11  | 2X     | 439.37         |
| 30 | LXQJSLJZ       | Linxian,Shanxi   | E110°29'40" | N37°57'25" | 0.21702±0.00701 | 3.23  | 2X     | 424.5          |
| 31 | LXQJSDMZ       | Linxian,Shanxi   | E110°29'40" | N37°57'25" | 0.21935±0.00101 | 0.46  | 2X     | 429.05         |
| 32 | LXQJS-1        | Linxian,Shanxi   | E110°29'40" | N37°57'25" | 0.22379±0.00600 | 2.68  | 2X     | 437.73         |
| 33 | YCCMZ          | Yanchuan,Shaanxi | E110°12'1"  | N36°53'2"  | 0.23138±0.00010 | 0.04  | 2X     | 452.57         |
| 34 | QXMGZ          | Qingxu,Shanxi    | E112°21'52" | N37°36'47" | 0.22404±0.00300 | 1.34  | 2X     | 438.22         |
| 35 | JSSZ           | Jishan,Shanxi    | E110°59'21" | N35°36'37" | 0.22667±0.01000 | 4.41  | 2X     | 443.36         |
| 36 | JSHMZ          | Jishan,Shanxi    | E110°59'21" | N35°36'37" | 0.22205±0.00300 | 1.35  | 2X     | 434.33         |
| 37 | JSZYZ          | Jishan,Shanxi    | E110°59'21" | N35°36'37" | 0.23076±0.00201 | 0.87  | 2X     | 451.37         |
| 38 | YCMZ           | Yuci,Shanxi      | E112°42'52" | N37°42'14" | 0.21951±0.00099 | 0.45  | 2X     | 429.37         |
| 39 | LXSEZ          | Linxian,Shanxi   | E110°29'40" | N37°57'25" | 0.22238±0.00701 | 3.15  | 2X     | 434.98         |
| 40 | LXDSZ          | Linxian,Shanxi   | E110°29'40" | N37°57'25" | 0.22215±0.00100 | 0.45  | 2X     | 434.52         |
| 41 | LXHZ           | Linxian,Shanxi   | E110°29'40" | N37°57'25" | 0.22509±0.00601 | 2.67  | 2X     | 440.28         |

|    |         |                  |             |            |                 |      |    |        |
|----|---------|------------------|-------------|------------|-----------------|------|----|--------|
| 42 | LYHDZ   | Linxian,Shanxi   | E110°29'40" | N37°57'25" | 0.20962±0.00499 | 2.38 | 2X | 410.01 |
| 43 | LYDCGZ  | Linyi,Shanxi     | E110°46'49" | N35°8'58"  | 0.21743±0.00600 | 2.76 | 2X | 425.29 |
| 44 | LFSZ    | Loufan,Shanxi    | E111°48'12" | N38°4'23"  | 0.22587±0.00400 | 1.77 | 2X | 441.8  |
| 45 | YCDBZ   | Yanchuan,Shaanxi | E110°12'1"  | N36°53'2"  | 0.21732±0.00600 | 2.76 | 2X | 425.07 |
| 46 | YCBZ    | Yanchuan,Shaanxi | E110°12'1"  | N36°53'2"  | 0.21710±0.00399 | 1.84 | 2X | 424.64 |
| 47 | LYLZ    | Linyi,Shanxi     | E110°46'49" | N35°8'58"  | 0.24411±0.00801 | 3.28 | 2X | 477.47 |
| 48 | LYLJZ   | Linyi,Shanxi     | E110°46'49" | N35°8'58"  | 0.22428±0.01000 | 4.46 | 2X | 438.7  |
| 49 | BDXZ    | Baode,Shanxi     | E111°5'33"  | N39°1'42"  | 0.24024±0.00702 | 2.92 | 2X | 469.91 |
| 50 | BDYZ    | Baode,Shanxi     | E111°5'33"  | N39°1'42"  | 0.25294±0.00799 | 3.16 | 2X | 494.76 |
| 51 | ZYMZ    | Zhongyang,Shanxi | E111°11'8"  | N37°21'46" | 0.23549±0.00301 | 1.28 | 2X | 460.62 |
| 52 | ZY TZ   | Zhongyang,Shanxi | E111°11'8"  | N37°21'46" | 0.22117±0.00599 | 2.71 | 2X | 432.6  |
| 53 | QXYZ    | Qingxu,Shanxi    | E112°21'52" | N37°36'47" | 0.22163±0.00898 | 4.05 | 2X | 433.51 |
| 54 | XFYZ    | Xiangfen,Shanxi  | E111°26'54" | N35°52'55" | 0.23170±0.00500 | 2.16 | 2X | 453.21 |
| 55 | YCPPZ   | Yuncheng,Shanxi  | E111°0'48"  | N35°1'57"  | 0.24756±0.00300 | 1.21 | 2X | 484.23 |
| 56 | JCJZ    | Jiaocheng,Shanxi | E112°9'45"  | N37°33'27" | 0.22359±0.00300 | 1.34 | 2X | 437.35 |
| 57 | YJHMZ   | Yongji,Shanxi    | E110°27'16" | N34°52'22" | 0.28574±0.00200 | 0.7  | 2X | 558.91 |
| 58 | XFGTZ   | Xiangfen,Shaanxi | E111°26'54" | N35°52'55" | 0.23253±0.00400 | 1.72 | 2X | 454.82 |
| 59 | XFMZ    | Xiangfen,Shaanxi | E111°26'54" | N35°52'55" | 0.23171±0.00899 | 3.88 | 2X | 453.22 |
| 60 | JSLGZ   | Jishan,Shanxi    | E110°59'21" | N35°36'37" | 0.23620±0.01101 | 4.66 | 2X | 462    |
| 61 | LXYJZ-1 | Linxian,Shanxi   | E110°29'40" | N37°57'25" | 0.25313±0.00101 | 0.4  | 2X | 495.13 |
| 62 | PLTTZ   | Pinglu,Shanxi    | E111°13'24" | N34°50'34" | 0.22847±0.00400 | 1.75 | 2X | 446.88 |
| 63 | PLJZ    | Pinglu,Shanxi    | E111°13'24" | N34°50'34" | 0.22810±0.00500 | 2.19 | 2X | 446.17 |
| 64 | XFYZZ   | Xiangfen,Shanxi  | E111°26'54" | N35°52'55" | 0.22889±0.00199 | 0.87 | 2X | 447.71 |
| 65 | XXYCZ   | Xiaxian,Shanxi   | E111°13'35" | N35°8'50"  | 0.23150±0.00299 | 1.29 | 2X | 452.82 |
| 66 | XXZYZ   | Xiaxian,Shanxi   | E111°13'35" | N35°8'50"  | 0.22883±0.00199 | 0.87 | 2X | 447.59 |
| 67 | JCDZ    | Jiaocheng,Shanxi | E112°9'45"  | N37°33'27" | 0.23151±0.00199 | 0.86 | 2X | 452.83 |
| 68 | YCDYZ   | Yanchuan,Shaanxi | E110°12'1"  | N36°53'2"  | 0.22247±0.00501 | 2.25 | 2X | 435.16 |
| 69 | DLXDD   | Dali,Shaanxi     | E109°56'54" | N34°48'6"  | 0.22009±0.00099 | 0.45 | 2X | 430.5  |
| 70 | DLMYZ   | Dali,Shaanxi     | E109°56'54" | N34°48'6"  | 0.23982±0.00199 | 0.83 | 2X | 469.09 |
| 71 | DLJDZ   | Dali,Shaanxi     | E109°56'54" | N34°48'6"  | 0.22286±0.00100 | 0.45 | 2X | 435.92 |
| 72 | PCMZ    | Pucheng,Shaanxi  | E109°35'32" | N34°57'40" | 0.22143±0.00301 | 1.36 | 2X | 433.12 |
| 73 | PCYLZ   | Pucheng,Shaanxi  | E109°35'32" | N34°57'40" | 0.21607±0.00099 | 0.46 | 2X | 422.64 |
| 74 | PCDDZ   | Pucheng,Shaanxi  | E109°35'32" | N34°57'40" | 0.21774±0.00398 | 1.83 | 2X | 425.89 |
| 75 | DLLZ    | Dali,Shaanxi     | E109°56'54" | N34°48'6"  | 0.22471±0.00400 | 1.78 | 2X | 439.54 |
| 76 | DLLLZ   | Dali,Shaanxi     | E109°56'54" | N34°48'6"  | 0.21958±0.00698 | 3.18 | 2X | 429.49 |
| 77 | LTGLZ   | Lintong,Shaanxi  | E109°13'13" | N34°22'21" | 0.21910±0.00401 | 1.83 | 2X | 428.56 |
| 78 | DLYZ    | Dali,Shaanxi     | E109°56'54" | N34°48'6"  | 0.21363±0.00199 | 0.93 | 2X | 417.87 |
| 79 | DLGWB   | Dali,Shaanxi     | E109°56'54" | N34°48'6"  | 0.21132±0.00099 | 0.47 | 2X | 413.35 |
| 80 | YCTZ    | Yanchuan,Shaanxi | E110°12'1"  | N36°53'2"  | 0.21351±0.00199 | 0.93 | 2X | 417.63 |
| 81 | DLPCZ   | Dali,Shaanxi     | E109°56'54" | N34°48'6"  | 0.21503±0.00301 | 1.4  | 2X | 420.59 |
| 82 | DLZZ    | Dali,Shaanxi     | E109°56'54" | N34°48'6"  | 0.21527±0.00101 | 0.47 | 2X | 421.06 |
| 83 | DLFMG   | Dali,Shaanxi     | E109°56'54" | N34°48'6"  | 0.21953±0.00400 | 1.82 | 2X | 429.41 |
| 84 | DLGDZ   | Dali,Shaanxi     | E109°56'54" | N34°48'6"  | 0.21217±0.00301 | 1.42 | 2X | 415    |
| 85 | DLBSH   | Dali,Shaanxi     | E109°56'54" | N34°48'6"  | 0.21790±0.00100 | 0.46 | 2X | 426.22 |

|     |           |                  |             |            |                 |      |    |        |
|-----|-----------|------------------|-------------|------------|-----------------|------|----|--------|
| 86  | DLMZ      | Dali,Shaanxi     | E109°56'54" | N34°48'6"  | 0.21693±0.00399 | 1.84 | 2X | 424.31 |
| 87  | DLZCBZ    | Dali,Shaanxi     | E109°56'54" | N34°48'6"  | 0.22436±0.00101 | 0.45 | 2X | 438.85 |
| 88  | PYKDZ     | Pingyao,shanxi   | E112°10'56" | N37°11'44" | 0.21690±0.00399 | 1.84 | 2X | 424.26 |
| 89  | PYDZ      | Pingyao,shanxi   | E112°10'56" | N37°11'44" | 0.21525±0.00502 | 2.33 | 2X | 421.03 |
| 90  | LXXZZ-2   | Linxian,Shanxi   | E110°29'40" | N37°57'25" | 0.24856±0.00897 | 3.61 | 2X | 486.18 |
| 91  | LXYJZ-3   | Linxian,Shanxi   | E110°29'40" | N37°57'25" | 0.23711±0.00901 | 3.8  | 2X | 463.79 |
| 92  | LXTHDMZ-1 | Linxian,Shanxi   | E110°29'40" | N37°57'25" | 0.24027±0.00199 | 0.83 | 2X | 469.97 |
| 93  | LXSJLNNZ  | Linxian,Shanxi   | E110°29'40" | N37°57'25" | 0.22777±0.00100 | 0.44 | 2X | 445.52 |
| 94  | LXCNNZ    | Linxian,Shanxi   | E110°29'40" | N37°57'25" | 0.22209±0.01201 | 5.41 | 2X | 434.4  |
| 95  | LXEBCSZ   | Linxian,Shanxi   | E110°29'40" | N37°57'25" | 0.23380±0.00198 | 0.85 | 3X | 685.98 |
| 96  | LFCZ      | Loufan,shanxi    | E111°48'12" | N38°4'23"  | 0.22388±0.00401 | 1.79 | 2X | 437.9  |
| 97  | XFHLZ     | Xiangfen,Shanxi  | E111°26'54" | N35°52'55" | 0.22141±0.00100 | 0.45 | 2X | 433.07 |
| 98  | XXDSZ     | Xixian,shanxi    | E110°56'51" | N36°41'56" | 0.20824±0.00200 | 0.96 | 2X | 407.32 |
| 99  | LXQKKZ    | Linxian,Shanxi   | E110°29'40" | N37°57'25" | 0.21333±0.00501 | 2.35 | 2X | 417.27 |
| 100 | LXMZ      | Linxian,Shanxi   | E110°29'40" | N37°57'25" | 0.21419±0.00300 | 1.4  | 2X | 418.95 |
| 101 | LXWWZ     | Linxian,Shanxi   | E110°29'40" | N37°57'25" | 0.21164±0.00999 | 4.72 | 2X | 413.96 |
| 102 | LXHGX     | Linxian,Shanxi   | E110°29'40" | N37°57'25" | 0.21552±0.00300 | 1.39 | 2X | 421.55 |
| 103 | LXGJJZ    | Linxian,Shanxi   | E110°29'40" | N37°57'25" | 0.23797±0.00100 | 0.42 | 2X | 465.47 |
| 104 | LXXCZ     | Linxian,Shanxi   | E110°29'40" | N37°57'25" | 0.23099±0.00400 | 1.73 | 2X | 451.82 |
| 105 | JSNYDBZ   | Jishan,Shanxi    | E110°59'21" | N35°36'37" | 0.22062±0.00132 | 0.6  | 3X | 647.31 |
| 106 | JSNYXBZ   | Jishan,Shanxi    | E110°59'21" | N35°36'37" | 0.23332±0.00700 | 3    | 2X | 456.38 |
| 107 | JSMHZ     | Jishan,Shanxi    | E110°59'21" | N35°36'37" | 0.20880±0.00100 | 0.48 | 2X | 408.42 |
| 108 | JSLYPCZ   | Jishan,Shanxi    | E110°59'21" | N35°36'37" | 0.21158±0.00300 | 1.42 | 2X | 413.85 |
| 109 | JSLYYZ    | Jishan,Shanxi    | E110°59'21" | N35°36'37" | 0.20477±0.00600 | 2.93 | 2X | 400.53 |
| 110 | JSLYJXZ   | Jishan,Shanxi    | E110°59'21" | N35°36'37" | 0.21033±0.00801 | 3.81 | 2X | 411.4  |
| 111 | JSLYMTZ   | Jishan,Shanxi    | E110°59'21" | N35°36'37" | 0.21268±0.00200 | 0.94 | 2X | 416    |
| 112 | PLWWZ     | Pinglu,Shanxi    | E111°13'24" | N34°50'34" | 0.22421±0.00200 | 0.89 | 2X | 438.56 |
| 113 | PLGDZ     | Pinglu,Shanxi    | E111°13'24" | N34°50'34" | 0.21949±0.00301 | 1.37 | 2X | 429.33 |
| 114 | PYLJZ     | Pingyao,Shanxi   | E112°10'56" | N37°11'44" | 0.21049±0.00400 | 1.9  | 2X | 411.71 |
| 115 | PYSBL     | Pingyao,Shanxi   | E112°10'56" | N37°11'44" | 0.21092±0.00099 | 0.47 | 2X | 412.56 |
| 116 | TGNTSMZ   | Taigu,Shanxi     | E112°33'26" | N37°25'38" | 0.20772±0.00100 | 0.48 | 2X | 406.31 |
| 117 | TGFCCZ    | Taigu,Shanxi     | E112°33'26" | N37°25'38" | 0.20773±0.00700 | 3.37 | 2X | 406.32 |
| 118 | TGFCJZZ   | Taigu,Shanxi     | E112°33'26" | N37°25'38" | 0.21407±0.00599 | 2.8  | 2X | 418.72 |
| 119 | YCINN     | Yanchuan,Shaanxi | E110°12'1"  | N36°53'2"  | 0.24728±0.00099 | 0.4  | 2X | 483.68 |
| 120 | LTMHL     | Lintong,Shaanxi  | E109°13'13" | N34°22'21" | 0.21607±0.00099 | 0.46 | 2X | 422.63 |
| 121 | LXQJSTZ   | Linxian,Shanxi   | E110°29'40" | N37°57'25" | 0.21402±0.00101 | 0.47 | 2X | 418.63 |
| 122 | YLMTZ     | Yanliang,Shaanxi | E109°13'56" | N34°40'6"  | 0.21094±0.00500 | 2.37 | 2X | 412.59 |
| 123 | YCGTZ-1   | Yanchuan,Shaanxi | E110°12'1"  | N36°53'2"  | 0.21943±0.00402 | 1.83 | 2X | 429.21 |
| 124 | YCGTZ-2   | Yanchuan,Shaanxi | E110°12'1"  | N36°53'2"  | 0.21798±0.00100 | 0.46 | 2X | 426.36 |
| 125 | YCXCMZ    | Yanchuan,Shaanxi | E110°12'1"  | N36°53'2"  | 0.21769±0.00100 | 0.46 | 2X | 425.81 |
| 126 | YCTZZ     | Yanchuan,Shaanxi | E110°12'1"  | N36°53'2"  | 0.21781±0.00100 | 0.46 | 2X | 426.04 |
| 127 | YLCZ      | Yanliang,Shaanxi | E109°13'56" | N34°40'6"  | 0.22868±0.00599 | 2.62 | 2X | 447.3  |
| 128 | TGDGHPZ   | Taigu,Shanxi     | E112°33'26" | N37°25'38" | 0.22873±0.00333 | 1.46 | 3X | 671.1  |
| 129 | TGYZGZ    | Taigu,Shanxi     | E112°33'26" | N37°25'38" | 0.22545±0.00902 | 4    | 2X | 440.98 |

|     |           |                 |             |            |                 |      |    |        |
|-----|-----------|-----------------|-------------|------------|-----------------|------|----|--------|
| 130 | YHSZ1     | Yonghe,Shanxi   | E110°38'18" | N36°45'57" | 0.21966±0.00099 | 0.45 | 2X | 429.66 |
| 131 | XFGTW     | Xiangfen,Shanxi | E111°26'54" | N35°52'55" | 0.23414±0.00300 | 1.28 | 2X | 457.98 |
| 132 | LXLJZ     | Linxian,Shanxi  | E110°29'40" | N37°57'25" | 0.21962±0.00200 | 0.91 | 2X | 429.57 |
| 133 | LXQJSFZ-2 | Linxian,Shanxi  | E110°29'40" | N37°57'25" | 0.21436±0.00701 | 3.27 | 2X | 419.29 |
| 134 | QXPGZ     | Qingxu,Shanxi   | E112°21'52" | N37°36'47" | 0.21679±0.00199 | 0.92 | 3X | 636.06 |
| 135 | JSDBZ     | Jishan,Shanxi   | E110°59'21" | N35°36'37" | 0.24166±0.00500 | 2.07 | 2X | 472.69 |
| 136 | JXCMZ     | Jiaxian,Shanxi  | E110°59'21" | N35°36'37" | 0.23830±0.00500 | 2.1  | 2X | 466.12 |
| 137 | TGLZ      | Taigu,Shanxi    | E112°33'26" | N37°25'38" | 0.23076±0.00399 | 1.73 | 2X | 451.37 |
| 138 | TGYZ      | Taigu,Shanxi    | E112°33'26" | N37°25'38" | 0.21843±0.00500 | 2.29 | 2X | 427.25 |
| 139 | TGMXZ     | Taigu,Shanxi    | E112°33'26" | N37°25'38" | 0.23402±0.00199 | 0.85 | 2X | 457.75 |
| 140 | SLCZ      | Shilou,Shanxi   | E110°50'29" | N37°0'16"  | 0.21939±0.00401 | 1.83 | 2X | 429.13 |
| 141 | SLSZ      | Shilou,Shanxi   | E110°50'29" | N37°0'16"  | 0.22792±0.00100 | 0.44 | 2X | 445.81 |
| 142 | PLLZ      | Pinglu,Shanxi   | E111°13'24" | N34°50'34" | 0.20949±0.00501 | 2.39 | 2X | 409.77 |
| 143 | TGLHZ     | Taigu,Shanxi    | E112°33'26" | N37°25'38" | 0.21327±0.00100 | 0.47 | 2X | 417.15 |
| 144 | TGCSZ     | Taigu,Shanxi    | E112°33'26" | N37°25'38" | 0.21982±0.00400 | 1.82 | 2X | 429.96 |
| 145 | TGGYH     | Taigu,Shanxi    | E112°33'26" | N37°25'38" | 0.22628±0.00500 | 2.21 | 2X | 442.6  |
| 146 | TGDMZ     | Taigu,Shanxi    | E112°33'26" | N37°25'38" | 0.22452±0.00599 | 2.67 | 2X | 439.17 |
| 147 | TGMXH     | Taigu,Shanxi    | E112°33'26" | N37°25'38" | 0.22705±0.00500 | 2.2  | 2X | 444.11 |
| 148 | YCCZ      | Yuncheng,Shanxi | E111°0'48"  | N35°1'57"  | 0.22128±0.00600 | 2.71 | 2X | 432.83 |
| 149 | YCHMZ     | Yuncheng,Shanxi | E111°0'48"  | N35°1'57"  | 0.21958±0.00099 | 0.45 | 2X | 429.5  |
| 150 | YCMZZ     | Yuncheng,Shanxi | E111°0'48"  | N35°1'57"  | 0.22926±0.00401 | 1.75 | 2X | 448.44 |
| 151 | LYWMZ     | Linyi,Shanxi    | E110°46'49" | N35°8'58"  | 0.21778±0.00100 | 0.46 | 2X | 425.98 |
| 152 | LYZZLZ    | Linyi,Shanxi    | E110°46'49" | N35°8'58"  | 0.21480±0.00200 | 0.93 | 2X | 420.15 |
| 153 | XFGT-1    | Xiangfen,Shanxi | E111°26'54" | N35°52'55" | 0.22732±0.00100 | 0.44 | 2X | 444.64 |
| 154 | XFGT-2    | Xiangfen,Shanxi | E111°26'54" | N35°52'55" | 0.21909±0.00300 | 1.37 | 2X | 428.54 |
| 155 | YCCMZZ    | Yuci,Shanxi     | E112°42'52" | N37°42'14" | 0.23047±0.00602 | 2.61 | 2X | 450.79 |
| 156 | YCNTZ     | Yuci,Shanxi     | E112°42'52" | N37°42'14" | 0.22199±0.00100 | 0.45 | 2X | 434.21 |
| 157 | YCYZ      | Yuci,Shanxi     | E112°42'52" | N37°42'14" | 0.22177±0.00599 | 2.7  | 2X | 433.79 |
| 158 | TGLJZ-1   | Taigu,Shanxi    | E112°33'26" | N37°25'38" | 0.22660±0.00499 | 2.2  | 2X | 443.23 |
| 159 | TGLJZ-2   | Taigu,Shanxi    | E112°33'26" | N37°25'38" | 0.22505±0.00401 | 1.78 | 2X | 440.2  |
| 160 | LMX1      | Linxian,Shanxi  | E110°29'40" | N37°57'25" | 0.22396±0.00199 | 0.89 | 2X | 438.06 |
| 161 | LXRHZ     | Linxian,Shanxi  | E110°29'40" | N37°57'25" | 0.22202±0.00799 | 3.6  | 2X | 434.27 |
| 162 | LXYZ      | Linxian,Shanxi  | E110°29'40" | N37°57'25" | 0.21734±0.00200 | 0.92 | 2X | 425.11 |
| 163 | LXMZ      | Linxian,Shanxi  | E110°29'40" | N37°57'25" | 0.21845±0.00701 | 3.21 | 2X | 427.29 |
| 164 | LXSTZ     | Linxian,Shanxi  | E110°29'40" | N37°57'25" | 0.21212±0.00401 | 1.89 | 2X | 414.9  |
| 165 | LXHTZ     | Linxian,Shanxi  | E110°29'40" | N37°57'25" | 0.23116±0.00700 | 3.03 | 2X | 452.14 |
| 166 | LXDLLZ    | Linxian,Shanxi  | E110°29'40" | N37°57'25" | 0.22425±0.00300 | 1.34 | 2X | 438.64 |
| 167 | LXHHZ     | Linxian,Shanxi  | E110°29'40" | N37°57'25" | 0.21893±0.00300 | 1.37 | 2X | 428.22 |
| 168 | QXJLCZ    | Qixian,Shanxi   | E112°20'32" | N37°21'50" | 0.22113±0.00599 | 2.71 | 2X | 432.54 |
| 169 | LYYZ      | Linyi,Shanxi    | E110°46'49" | N35°8'58"  | 0.21753±0.00798 | 3.67 | 2X | 425.48 |
| 170 | LYDCYZ    | Linyi,Shanxi    | E110°46'49" | N35°8'58"  | 0.22302±0.00201 | 0.9  | 2X | 436.22 |
| 171 | XXLYKZ    | Xiaxian,Shanxi  | E111°13'35" | N35°8'50"  | 0.22963±0.00200 | 0.87 | 2X | 449.16 |
| 172 | JSBZY     | Jishan,Shanxi   | E110°59'21" | N35°36'37" | 0.22605±0.00099 | 0.44 | 2X | 442.15 |
| 173 | XFZSGT    | Xiangfen,Shanxi | E111°26'54" | N35°52'55" | 0.22146±0.00100 | 0.45 | 2X | 433.18 |

|     |         |                  |             |            |                 |      |    |        |
|-----|---------|------------------|-------------|------------|-----------------|------|----|--------|
| 174 | XFWSGT  | Xiangfen,Shanxi  | E111°26'54" | N35°52'55" | 0.23110±0.00601 | 2.6  | 2X | 452.04 |
| 175 | TYPZZ   | Taiyuan,Shanxi   | E112°33'23" | N37°52'37" | 0.22522±0.00500 | 2.22 | 2X | 440.53 |
| 176 | LXMZLMZ | Linxian,Shanxi   | E110°29'40" | N37°57'25" | 0.22536±0.00602 | 2.67 | 2X | 440.8  |
| 177 | LXMAISZ | Linxian,Shanxi   | E110°29'40" | N37°57'25" | 0.23322±0.00401 | 1.72 | 2X | 456.18 |
| 178 | YCHTZ   | Yanchuan,Shaanxi | E110°12'1"  | N36°53'2"  | 0.22174±0.00698 | 3.15 | 2X | 433.73 |
| 179 | JXHDDZ  | Jiaxian,Shanxi   | E110°29'50" | N38°1'32"  | 0.21477±0.00399 | 1.86 | 2X | 420.09 |
| 180 | YLYZ    | Yanliang,Shaanxi | E109°13'56" | N34°40'6"  | 0.21700±0.00200 | 0.92 | 2X | 424.46 |
| 181 | YLYZ    | Yanliang,Shaanxi | E109°13'56" | N34°40'6"  | 0.21617±0.00499 | 2.31 | 2X | 422.82 |
| 182 | YLLLZ   | Yanliang,Shaanxi | E109°13'56" | N34°40'6"  | 0.21883±0.00400 | 1.83 | 2X | 428.03 |
| 183 | PCZDZ   | Pucheng,Shaanxi  | E109°13'56" | N34°40'6"  | 0.21688±0.00499 | 2.3  | 2X | 424.22 |
| 184 | XADBZ   | Xian,Shaanxi     | E125°9'19"  | N42°55'59" | 0.21073±0.00200 | 0.95 | 2X | 412.18 |
| 185 | YCBZZ   | Yanchuan,Shaanxi | E110°12'1"  | N36°53'2"  | 0.21358±0.00199 | 0.93 | 2X | 417.77 |
| 186 | DLNZ    | Dali,Shaanxi     | E109°56'54" | N34°48'6"  | 0.22617±0.00301 | 1.33 | 2X | 442.38 |

Note: The tested materials were preserved in the National Horticultural Germplasm Repository – Jujube Subrepository by grafting from 2011 to 2015.
