# Supplementary material for: Genomic C-Value Variation Analysis in Jujube (Ziziphus jujuba Mill.) in the Middle Yellow River Basin
Source: MDPI journal article supplement (doi:10.3390/plants12040858), 2023-02-14
Supplement: s1 [file s1]

**Table S2 Correlation analyses between genome size and multiple fruit traits.**

| Trait | SRW  | FLD     | FTP      | SW      | SF    | TS      | TA      | VC    | FER      | GS             |
|-------|------|---------|----------|---------|-------|---------|---------|-------|----------|----------------|
| SRW   | 1.00 | 0.53*** | 0.68***  | 0.40*** | -0.23 | -0.01   | -0.21** | -0.16 | 0.09     | <b>0.25*</b>   |
| FLD   |      | 1.00    | -0.45*** | 0.19    | -0.04 | 0.07    | 0.15    | 0.15  | 0.50***  | -0.04          |
| FTP   |      |         | 1.00     | 0.20    | 0.18  | 0.02    | 0.19    | 0.02  | 0.33***  | 0.02           |
| SW    |      |         |          | 1.00    | -0.07 | -0.11   | -0.15   | -0.03 | -0.79*** | -0.08          |
| SF    |      |         |          |         | 1.00  | 0.52*** | -0.04   | 0.06  | -0.15    | -0.10          |
| TS    |      |         |          |         |       | 1.00    | -0.05   | -0.06 | -0.01    | 0.06           |
| TA    |      |         |          |         |       |         | 1.00    | 0.16  | -0.28*   | 0.15           |
| VC    |      |         |          |         |       |         |         | 1.00  | 0.07     | <b>0.38***</b> |
| FER   |      |         |          |         |       |         |         |       | 1.00     | -0.05          |
| GS    |      |         |          |         |       |         |         |       |          | 1.00           |

NOTE: Single star \* means that r value was significant at the level of 0.01. Single star \*\* means that r value was significant at the level of 0.001 Single star \*\*\* means that r value was significant at the level of 0.0001. SRW: Single fruit weight; FLD: Fruit length; FTP: Fruit width; SW: Stone weight; SF: Soluble solids content; TS: Total soluble sugar content; TA: Titratable acid content; VC: Vitamin C content; FER: fresh edible rate; GS: genomic C value
